# Supplementary material
Source: HighWire-hosted journal article supplement (https://bmjopen.bmj.com/content/7/8/e017100)
Supplement: inline-supplementary-material-1 [file inline-supplementary-material-1.pdf]

## Appendix 1: Survey Instrument

We are conducting a research study to measure residents' awareness of factors that can influence patient satisfaction. Residents, like you, are important providers of medical care in academic institutions, and as such have an impact on patient satisfaction. Given the important role you play in patient care, we want to learn what you believe affects the satisfaction of your patients with the care you provide. For pediatric patients, the survey refers to parent satisfaction only.

### Part I: Tell us about you.

1. What year are you in residency?

- PGY-1
- PGY-2
- PGY-3
- PGY-4
- Other (specify) \_\_\_\_\_

2. Type of residency program

- Internal Medicine
- Pediatrics
- Internal Medicine-Pediatrics
- Preliminary Program
- Transitional Program
- Surgery
- Obstetrics and Gynecology
- Other (specify) \_\_\_\_\_

3. What is your age range?

- Under 25
- 25-29
- 30-34
- 35 and over

4. What gender are you?

- Male
- Female

5. Are you of Hispanic or Latino origin?

- Yes
- No

6. What is your race? (Mark all that apply)

- Black or African American
- White
- Asian
- Other (specify) \_\_\_\_\_

7. Do you have additional graduate degrees?

- No
- MPH
- MBA
- Other (specify) \_\_\_\_\_

## **Part II: Understanding Drivers of Patient Satisfaction**

**Think about the factors listed below that may influence the satisfaction of patients with the care you provide. How important or unimportant do you consider each of the following influences on the satisfaction of your patients with your care?**

|                                                         |                      |                    |           |                |                     |
|---------------------------------------------------------|----------------------|--------------------|-----------|----------------|---------------------|
| 1. Ranking of medical school that physician attended    | Not at all Important | Slightly Important | Important | Very Important | Extremely Important |
| 2. Poor health status of patient                        | Not at all Important | Slightly Important | Important | Very Important | Extremely Important |
| 3. Physician explaining tests, treatments, diagnosis    | Not at all Important | Slightly Important | Important | Very Important | Extremely Important |
| 4. Board certification status of physician              | Not at all Important | Slightly Important | Important | Very Important | Extremely Important |
| 5. Responsiveness of ancillary staff to patient's needs | Not at all Important | Slightly Important | Important | Very Important | Extremely Important |
| 6. Level of education of patient                        | Not at all Important | Slightly Important | Important | Very Important | Extremely Important |
| 7. Thoroughness and competence of physician             | Not at all Important | Slightly Important | Important | Very Important | Extremely Important |
| 8. Nurses willingness to listen to patient              | Not at all Important | Slightly Important | Important | Very Important | Extremely Important |
| 9. Physician rank in medical school                     | Not at all Important | Slightly Important | Important | Very Important | Extremely Important |
| 10. Explanations provided by nurses                     | Not at all Important | Slightly Important | Important | Very Important | Extremely Important |
| 11. Courtesy and respect from nurses                    | Not at all Important | Slightly Important | Important | Very Important | Extremely Important |
| 12. USMLE score of physician                            | Not at all Important | Slightly Important | Important | Very Important | Extremely Important |
| 13. Income level of patient                             | Not at all Important | Slightly Important | Important | Very Important | Extremely Important |
| 14. Age of physician                                    | Not at all Important | Slightly Important | Important | Very Important | Extremely Important |
| 15. Courtesy and respect from physician                 | Not at all Important | Slightly Important | Important | Very Important | Extremely Important |
| 16. Listening skills of physician                       | Not at all Important | Slightly Important | Important | Very Important | Extremely Important |
| 17. Age of patient                                      | Not at all Important | Slightly Important | Important | Very Important | Extremely Important |
| 18. Gender of patient                                   | Not at all Important | Slightly Important | Important | Very Important | Extremely Important |
| 19. Gender of physician                                 | Not at all Important | Slightly Important | Important | Very Important | Extremely Important |
| 20. Discussions about treatment provided by nurse       | Not at all Important | Slightly Important | Important | Very Important | Extremely Important |

### **Part III: Personal Experiences**

**Which of the following experiences have added to your understanding of what affects patients' satisfaction with the care you provide? If you have not personally had any of the experiences below, please select N/A (not applicable).**

21. Your own hospitalization

- N/A     No impact     Slight Impact     Moderate Impact     Large Impact

22. Hospitalization of a family member or friend

- N/A     No impact     Slight Impact     Moderate Impact     Large Impact

23. Observation of your peer's interaction with patients (i.e. other interns or residents)

- N/A     No impact     Slight Impact     Moderate Impact     Large Impact

24. Observation of supervisor's interactions with patients (i.e. attending)

- N/A     No impact     Slight Impact     Moderate Impact     Large Impact

25. Feedback from faculty evaluations

- N/A     No impact     Slight Impact     Moderate Impact     Large Impact

26. Feedback from nursing evaluations

- N/A     No impact     Slight Impact     Moderate Impact     Large Impact

27. Feedback from patient evaluations

- N/A     No impact     Slight Impact     Moderate Impact     Large Impact

### **Part IV: Education about Patient Satisfaction**

28. How many times have you had an educational session that discussed patient satisfaction during medical school?

- 0     1     2     3     4     5 or more

29. How many times have you had an educational session that discussed patient satisfaction during residency?

- 0     1     2     3     4     5 or more

30. If you have attended an educational session on patient satisfaction, check all that apply.

- Resident lecture (i.e. noon conference, grand rounds, sub-specialty conference, etc.)  
 Medical student lecture  
 Workshop on patient safety at a local or national meeting  
 Hospital orientation  
 I have never attended a lecture on patient satisfaction

31. Please answer the following: I feel confident that my patients are satisfied with the care I provide.

- Strongly disagree     Disagree     Neutral     Agree     Strongly agree

**Thank you for taking the time to complete this survey. Your opinion matters!!**
